# A fully automated spike sorting algorithm using t-distributed neighbor embedding and density based clustering

Mohammad Hossein Nadian<sup>1</sup>, Saeed Karimimehr<sup>1</sup>, Jafar Doostmohammadi<sup>1</sup>,  
Ali Ghazizadeh<sup>2\*</sup>, Reza Lashgari<sup>1\*</sup>,

<sup>1</sup>*Brain Engineering Research Center, Institute for Research in Fundamental  
Sciences (IPM), P.O. Box 19395-5531, Tehran, Iran*

<sup>2</sup>*Electrical Engineering Department, Sharif University of Technology, Tehran, Iran*

\* *Corresponding authors: rezalashgari@gmail.com, ghazizadeh@sharif.edu.*

Tel: (98) 912 313488; Fax: (98) 2126130678;

# **Abstract**

In this study, a new spike sorting method was developed based on a combination of two methods, t-Distributed Stochastic Neighbor Embedding (t-SNE) and Density-Based Spatial Clustering of Applications with Noise (DBSCAN). Parameters of both methods were simultaneously optimized using a Genetic Algorithm (GA) using a simulated dataset containing 2 to 20 simultaneously recorded neurons. The performance of this method was evaluated using both a stimulated dataset as well as real multichannel electrophysiological data. The results indicated that our fully automated algorithm using t-SNE-DBSCAN outperforms other state-of-the-art algorithms and human experts in spike sorting especially when there are a large number of simultaneously recorded units. Our algorithm also determines the noise waveforms and has an overall high sensitivity, precision and accuracy for correctly classifying waveforms belonging to each neuron (all >90%) without the need for manual corrections afterwards. Our method can be a crucial part of the analysis pipeline in particular when manual sorting of units is becoming prohibitive due to the sheer number of recorded neurons per session.

**Keywords:** Spike sorting; t-SNE; DBSCAN; Genetic algorithm, Multichannel recording

# **1. Introduction**

Neurons are the building blocks of the nervous system. Inspecting and investigating the activity of single neurons is the foundation for understanding the brain mechanisms. Since a few decades, it has been possible to decode the behavior of single neuron activity from multiunit brain recordings (Moser and Moser, 2013; O'Keefe, 1976; Olshausen and Field, 1997). The basis of this recording is by measuring reflected current flows in the extracellular medium. Usually, neural action potentials or spikes are detected with extracellular recordings, typically using micro-electrodes (metal, silicon or glass micropipettes)(Buzsáki et al., 2012). The procedure of discriminating the spikes of each neuron from the multiunit recorded neural signal is usually referred to as “spike sorting” and is often based on the shape of the spikes as the discriminative information (Gibson et al., 2012). The goal in spike sorting is to find the number of neurons recorded in a single channel and to specify the activation times of each neuron (Quiroga, 2012).

Spike sorting has been studied extensively during the last decades. Some of its applications are neural interfaces (Oliynyk et al., 2012; Todorova et al., 2014), new prosthetic control devices (Zaghloul and Bayoumi, 2015), neurorehabilitation (Farina et al., 2013), and cognitive studies (Moser and Moser, 2013; O'Keefe, 1976). Review papers by Lewicki (1998), Gibson et al. (2012) and Rey et al. (2015) summarized a large number of techniques used for spike sorting. Some algorithms

are designed for sorting single channel extracellular signals while others were developed for recording systems like stereotrodes or tetrodes. Commonly applied methods for single-channel spike sorting are principal component analysis (PCA) (Adamos et al., 2008), Bayesian approaches (Haga et al., 2013), wavelet-based algorithms (Kim and Kim, 2003; Quiroga et al., 2004), and filter-based methods (Calabrese and Paninski, 2011). Spike sorting methods for multi-channel recordings have been proposed by Carlson et al. (2014); Swindale and Spacek (2014); and Rossant et al. (2016). Recently, the electrode technology has made it possible to record from hundreds of neurons concurrently with sub-millisecond timescale (Stevenson and Kording, 2011). However, the algorithm developments have been slower and currently the efficient and reliable sorting of a large number of neurons is challenging (Pedreira et al., 2012; Rey et al., 2015). Unfortunately, the amount of information that needs to be processed is now too high for a spike sorting in manual or semi-automated fashion (Einevoll et al., 2012). Thus, the main challenge is to develop automatic spike sorting algorithms (Wood et al., 2004).

In this paper, we introduce a novel automatic spike sorting algorithm based on t-Distributed Stochastic Neighbor Embedding (t-SNE), developed by Maaten and Hinton (2008), and Density-based spatial clustering of applications with noise (DBSCAN) combination, specifically designed for decoding large number of neurons in single-channel extracellular recordings. The t-SNE algorithm, like other

dimensionality reduction methods, transforms the data in the high-dimensional space to a space of fewer dimensions. However, t-SNE unlike most of the techniques are capable of retaining both the local and the global structures of the data in a single map (Maaten and Hinton, 2008).

## 2. Materials and methods

In this study, spike sorting performance with increasing number of neurons was evaluated for simulated 10 minutes-long extracellular recordings datasets including different number of single units, from 2 to 20 recorded on a single channel (total of 95 channels) (<http://bioweb.me/CPGJNM2012-dataset>). The spike sorting algorithm was also tested on real multi-electrode array neural recordings (Ghazizadeh et al., 2012). The neural recordings were conducted in Long-Evans rats from the Nucleus accumbens shell, using drivable 16 electrode array. This system allowed recording simultaneously from multiple neurons across the 16 channels of recording (Ghazizadeh et al., 2012).

The overall procedure of the proposed spike sorting algorithm is illustrated in Fig 1.

The method consists of the following steps:

1- Spike detection

2- Dimensionality reduction of spikes by t-SNE method

3- Clustering spikes by DBSCAN method

## 2.1. Spike detection

As all spike sorting algorithms, the initial step prior to the sorting method is to extract the spikes from the recording data. Primary preprocessing and band-pass filtering (300–6000 Hz, four pole Butterworth), enhances the spike detection on top of the background noise activity. Generally, spike detection is carried out by amplitude thresholding (T). To set an automatic threshold, a method is described based on the median absolute deviation (MAD).

$$MAD(x) = \text{median}(|x_i - \text{median}(x)|) \quad (1)$$

where  $x$  is the bandpass-filtered signal. In common cases where the median of signal ( $x$ ) is zero, the Eq. 1 simplifies to:

$$MAD(x) = \text{median}(|x_i|) \quad (2)$$

This method measures the variability of a univariate sample of quantitative data. Therefore, the variance is then robustly estimated as (Donoho and Johnstone, 1994):

$$\hat{\sigma} = k * MAD(x) \quad (3)$$

where  $k=1.4826$  is a scale factor for normally distributed. Generally, amplitude threshold (T) is defined as the multiple ( $\cong 4$ ) of an estimate of the standard deviation of the noise (Quiroga et al., 2004):

$$T=4\hat{\sigma}_n \quad (4)$$

where  $\hat{\sigma}_n$  is an estimate of the standard deviation of the background noise.

After detection of all of the likely spikes, the next step is to store the detected spike waveforms (~2 ms long) in an array and align them to the spike peak in such a way that the peaks were located in the middle of the array. This array is passed to the next step.

## 2.2. t-Distributed Stochastic Neighbor Embedding (t-SNE)

Before clustering step, dimensions of spikes were reduced by t-SNE method. Briefly, t-SNE method converts high-dimensional data points into a lower dimension by minimizing the Kullback-Leibler (KL) distance between the joint probability distribution defined between each two data point under high- and low- dimensional spaces. The joint probability distribution is made by using a Gaussian centered at each point in the high dimensional space and a heavy-tailed Student-t distribution in the low dimensional space. A major strength of t-SNE is its capability in retaining the local structure of the data while also revealing some important global structure (Maaten and Hinton, 2008). The primary results of the t-SNE spikes map indicated that much of the local structure of the spikes is captured as well. Therefore, this method was used as a feature extraction algorithm for spikes. For achieving the best condition, the parameters of t-SNE algorithms must be optimized. One of the important parameters in t-SNE algorithm is the distance metric which can be Euclidean, Standardized Euclidean, City block, Chebychev,

Minkowski, Mahalanobis, Cosine, Linear Correlation, Spearman's rank correlation, Hamming or Jaccard coefficient distances for both Gaussians and t-distributions. Also, perplexity or effective number of local neighbors of each point is another important parameter of Kullback-Leibler algorithm which must be specified. Other parameters include exaggeration which is size of natural clusters in data, and number of dimension of the representation. All of the parameters were optimized using Genetic Algorithm (GA) for simulated data (see below for details of GA).

### 2.3. DBSCAN Clustering

Density-based spatial clustering of applications with noise (DBSCAN) is a density-based clustering method first introduced by Ester et al. (1996). As opposed to some clustering methods such as k-means, DBSCAN does not require to specify the number of clusters in the data. Furthermore, DBSCAN can find general cluster shapes and does not force all points to fall into detected clusters unlike k-means algorithm. DBSCAN has two free parameters: size of neighborhood considered around each point ( $\epsilon$ ) and minimum number of points that should be in a cluster (MinPts). These parameters were also optimized along with the t-SNE parameters using GA for the above-mentioned ground truth dataset.

## 2.4. Genetic Algorithms (GA)

The six free parameters of the algorithm (distance metric, perplexity, exaggeration, number of dimension,  $\epsilon$  and MinPts) were optimized using a GA. Some options of the GA are indicated in Table 1. Therefore, 6-dimensional string (chromosome) are presented for solving this problem. The overall procedure for combined optimization of t-SNE and DBSCAN using GA, illustrated in Fig 2, includes the following steps:

1. The first step in the functioning of a GA is the generation of an initial population. Certainly, if the initial population to the GA is good, then the algorithm has a better possibility of finding a good solution. The initial generation is random in the specified range that seemed to end up with acceptable results in pilot tests (Table 2)
2. The accuracy of confusion matrix (Acc) is calculated for each session of simulated spikes that ranged from 2 to 20 neurons in a given session for every 6-dimensional string (chromosome) using Equation 5:

$$\text{Acc} = \frac{\text{True positives}}{\text{Total predictions}} \quad (5)$$

3. A cost function (J) was defined based on the averages accuracy values (A) of confusion matrixes of all sessions:

$$J = 1 - \text{avg}(\text{Acc}) \quad (6)$$

4. Scores each member of the current population by computing its fitness value.  
(population size = 200). Selects parents, based on their expectation.
5. Forming a gene pool: children are produced either by making a random vector from a Gaussian distribution to the parent (mutation) or by creating the child as a random weighted average of the parents (crossover). The crossover fraction of 0.7 means that 70% children other than elite individuals are crossover children. Finally, new population replaced to form the next generation.
6. This procedure continues until either of stopping criteria (Generations=100; Function tolerance= $10^{-6}$ ; Nonlinear constraint tolerance= $10^{-6}$ ) is reached.

## 2.5. Evaluation of the optimal t-SNE and DBSCAN algorithm

In order to describe the performance of the designed classification model, confusion matrix of each evaluated signal was obtained based on comparing the dataset ground truth with clusters identified by designed t-SNE and DBSCAN algorithm. Each identified cluster was assessed as valid if at least 50% of its spikes were time-locked to the spikes of an actual simulated neuron (Martinez et al., 2009). The values of true positives (TP), true negatives (TN), false positives (FP) and false negatives (FN) of each confusion matrix were calculated. Then, the values of sensitivity or true

positive rate (TPR) and precision or positive predictive value (PPV) were obtained by the following equations:

$$\text{TPR} = \frac{\text{TP}}{\text{TP} + \text{FN}} \quad (7)$$

$$\text{PPV} = \frac{\text{TP}}{\text{TP} + \text{FP}} \quad (8)$$

Another performance measure is based on the histogram of the Inter-Spike-Interval (ISI). When spikes from two different neurons are incorrectly classified as a single cluster, it is possible to have spikes with ISIs below the minimum refractory period of the neuron (taken to be below 2 ms in this study). If the proportion of refractory period violations is significant, it can be seen as a measure of poor isolation of the single units. Finally, the optimal t-SNE and DBSCAN spike sorting algorithm obtained from GA was assessed using a real data. The results were compared with the sorting was performed independently and blindly by three expert operators.

### 3. Results and discussion

#### 3.1. The optimal values of t-SNE and DBSCAN parameters

According to GA results, the optimal values of t-SNE and DBSCAN parameters were obtained (Table 3). Based on these optimal values, the optimal spike sorting algorithm was developed and assessed for simulated and real datasets.

## 3.2. Spike sorting results

The results of the proposed algorithm for a sample population of 10 neurons are shown in Fig. 3. The optimal t-SNE and DBSCAN algorithm correctly detected 10 neurons, with accuracies ranging from 97.1% to 100.0% across neurons ( $98.6 \pm 0.1\%$ ). In this example, there were no false positive neurons. The sorting identification sensitivity and precision were on average  $99.2 \pm 0.7$  and  $99.3 \pm 0.6$ , respectively. There was not any firing time inconsistency (i.e., ISI values less than 2 ms) in any of the detected classes. The overall performance of the robust algorithm is summarized in Table 4 and Figure 4. Overall, the number of missed and erroneous detected neurons was  $1.5 \pm 1.3$  and  $1.4 \pm 0.5$ , respectively. The overall sensitivity, precision and accuracy for correctly identified neuron classes were  $97.8 \pm 1.2$ ,  $90.1 \pm 4.8$  and  $94.4 \pm 1.4$  respectively. These results indicated that the combination of t-SNE with DBSCAN works well for sorting spikes of different neurons in a fully automatic fashion. Next, the performance of our algorithm was compared with WAVECLUS using the same synthetic data. .

## 3.3. Comparison with the state-of-the-art

The sorting algorithm proposed by Quiroga et al. (2004), which is an open source and freely available software ([https://github.com/csn-le/wave\\_clus](https://github.com/csn-le/wave_clus)), known as

WAVECLUS, was used for comparison with the proposed optimal t-SNE and DBSCAN sorter algorithm. It was shown in the literature that the other well-known algorithm, KlustaKwik, proposed by Harris et al. (2000) has the same performance as WAVECLUS algorithm (Pedreira et al., 2012). They are, in fact, among the most cited algorithms in spike sorting literature (Wild et al., 2012). The neural decoded data used for comparison was the previously published result of the operation of three experts with parameter optimization using the WAVECLUS GUI (Pedreira et al., 2012).

The performance of optimal t-SNE and DBSCAN sorter algorithm was compared with that of WAVECLUS in terms of the number of the units were correctly identified (hits) as well as maximum and minimum (Fig. 5). Note that we have taken the results of WAVECLUS as previously published in Quiroga et al. (2004) and have used the same performance measures for comparison. As seen in this figure, the average number of hits as well as maximum and minimum of optimal t-SNE and DBSCAN sorter algorithm were in general higher than with those of WAVECLUS. Overall, 48% increase in the number of hits was obtained in our algorithm compared with WAVECLUS. Although the two methods were almost similar where number of neurons was equal or less than 7, the proposed algorithm significantly outperformed the other algorithm when the number of neurons was equal or greater than 8 (Fig. 5B).

The average missed neuron and false positive errors of the proposed algorithm for different number of neurons is shown in Fig. 6. The proposed algorithm outperformed the WAVECLUS algorithm (Rey et al., 2015)(Fig. 5), particularly in terms of missed errors (see Fig. 4B of Pedreira et al. (2012)).

The knowledge derived from these results is that the our proposed algorithm could effectively improve spike sorting of simulated data. To further validate our method, our algorithm was next tested on real data and results was shown in following section.

### **3.4. Comparison with the real data**

The performance of optimal t-SNE and DBSCAN sorter algorithm on real data were compared with sorting carried out by three human experts using Plexon offline sorter V3.3.5 manually. For this purpose, 91691 spikes are detected using an amplitude threshold after filtering real data and each expert clustered these spikes separately. The spikes were also separately clustered by our fully automated algorithm. Result of sorting the real data with the proposed algorithm is shown in Fig. 7. Because there is no ground truth here for comparing and statistical analysis, we use the intersection of both spikes in corresponding clusters in proposed algorithm and experts as a measure of truly detected spikes. In this method, as seen in Fig. 8A, the corresponding spike clusters have an intersection area ( $c$ ) of mutually detected

spikes as well as relative complements of proposed algorithm not in expert (*a*) and vice versa (*b*).

As a measure of quality of spike sorting, we assumed that average correlation between the spikes in relative complements in our algorithm and in the expert with the representative of spikes in the intersection area, can tell us whether detected spikes in the relative complements really represented true positives. The higher this average correlation, the better the sorting algorithm (Table 5). We assume that this average correlation can speak to the homogeneity of detected spikes in each algorithm or the experts, compared to the intersection. The homogeneity is defined as the average of correlation coefficients between representatives (mean point) of intersection cluster (*c*) with relative complement spikes in areas ‘a’ or ‘b’. The same measure was calculated by comparing spike clusters between experts. As can be seen the homogeneity of responses in the proposed algorithm was not significantly different from the experts (Fig 8B,  $F_{2,33}=2.45$   $P=0.09$ ). There was even a nonsignificant trend for higher homogeneity for the algorithm.

As another quality measure, we defined consistency as the number of spikes in the intersection clusters (c) divided by spike numbers of ‘a’U’c’ or spike numbers of ‘c’U’b’ expressed as percentage (Fig 8C). As shown in Fig. 8C, the consistency between expert and the proposed method is significantly higher than the consistency between experts themselves. This means that the algorithm is consistent with the consensus of the experts.

According to Table 5, average of Pearson’s correlation coefficient between representative of intersection cluster and relative complements of proposed algorithm (area ‘b’) #1-3 were 89.6, 89.4 and 92.11, respectively. These values for relative complements of experts (area ‘a’) were 78.52, 82.27 and 83.55, respectively. Thus on average the correlation coefficient with intersection (area ‘c’) was higher for the algorithm compared to the experts.

Also, we assumed that percentage of spikes with  $\rho < 90\%$ , can be interpreted as false positive error. This percentage was also lower for the proposed algorithm compared to the experts. As seen in Table 5, the average of these values for expert #1-3 are 88.52, 72.95 and 64.91 versus 47.77, 55.28 and 24.59 for proposed algorithm, respectively. As a result, it is clear that the combination of t\_SNE with DBSCAN algorithm considerably improve sorting of real data.

## 4. Discussion

Direct electrophysiological recording of neurons is the gold standard for understanding the signal processing in the brain. Recent advances in technology that allows simultaneous recording of many neurons across a large number of channels present a challenge for manual spike sorting. In this study, a combination of two methods t-SNE and DBSCAN was developed for an off-line and fully-automated spike sorting algorithm. Our algorithm outperformed the state of the art for spike sorting using WAVECLUS as well as manual spike sorting by experts in simulated and real neural recordings. In particular our algorithm performance was significantly better than WAVECLUS when the number of neurons was large (Fig 5). The sensitivity and accuracy of spike sorting was above 90% and specificity was above 80% in simulated data for up-to 20 simultaneously recoded neurons (Fig 4). Detected neurons had distinct spike shapes with ISI distribution outside the refractory period in almost all cases in both simulated (Fig 3) and real data (Fig 7). Comparison of algorithm performance with that of manual sorting by experts showed equal or better performance as measured by homogeneity of spike shapes for detected neurons (Fig 8b).

The six parameters in our algorithm were optimized using a genetic algorithm. While this algorithm was optimized on the simulated data, using the same parameters on the real spike seemed to give satisfactory results compared to the manual sorting by experts. Ideally, if manual sorting for a large number of different experiments become available the parameter optimization can be done on matching performance of the experts while maximizing the desired cost function such as homogeneity or consistency. Such optimization should result in even better performance of algorithm on real data in the future.

The main problem that we tried to overcome was sorting of large number of neurons. Although some methods tried to tackle this issue (Ekanadham et al., 2014; Pedreira et al., 2012) but most of the sorting methods to date (Carlson et al., 2014; Franke et al., 2010) focused their attention on sorting a small number of neurons ( $< 10$ ). One of the advantages of our method is its ability to deal with sparse firing neurons while most of the other algorithms (Ekanadham et al., 2014; Franke et al., 2010; Hilgen et al., 2017; Yger et al., 2016) miss these neurons because of few spikes per second. This is because in those algorithms neurons with low firing rate are often discarded as noise or are grouped together with neurons with more numerous but similar spikes. A problem that is avoided in our algorithm by using density based clustering which is less sensitive to the actual cluster shape and size. The other advantage of the

proposed algorithm is that it is fully automated without the need for manual post processing correction. As sorting of large signals or big number of channels can be difficult and cumbersome, having an automatic and unsupervised method compared to other supervised or semi-supervised algorithms (Adamos et al., 2008; Calabrese and Paninski, 2011; Haga et al., 2013; Kim and Kim, 2003; Quiroga et al., 2004; Vargas-Irwin and Donoghue, 2007) would be highly desirable.

Results highlight advantages of our proposed algorithm in sorting data from brain regions as well as simulated dataset using the same parameters illustrates the power of this approach. Also, the results indicated that the t-SNE apparently handles some changes in waveforms of spikes result maybe from movement of electrodes relative to the tissue. We have provided a software equipped with a graphical user interface (GUI) that implements our t-SNE-DBSCAN algorithm along with this paper. Although our software runs quickly on datasets with low number spikes, the clustering time theoretically scales linearly with the number of spikes.

Taken together, our results demonstrate the optimal t-SNE and DBSCAN sorter algorithm can perform the spike sorting in a fully automated fashion with high accuracy, sensitivity and precision. In future work, we will be extending our algorithm to handle cases such as tetrode recording in which the same unit can

appear in multiple channels. In addition, the current algorithm will take some time to sort the recorded spikes into separate clusters corresponding to each unit and thus is not well suited for online applications. Adaptations of this model where clustering can be done in an adaptively and in trial by trial fashion in real time would be an important extension for future work which will allow its use in brain machine interface applications as well.

## Acknowledgment

The authors acknowledge and appreciate the funding support provided by the IPM. The authors would like to thank Dr. Bahareh Taghizadeh for helpful comments.

## References

- Adamos DA, Kosmidis EK, Theophilidis G. Performance evaluation of PCA-based spike sorting algorithms. *Computer methods and programs in biomedicine*, 2008; 91: 232-44.
- Buzsáki G, Anastassiou CA, Koch C. The origin of extracellular fields and currents—EEG, ECoG, LFP and spikes. *Nature reviews neuroscience*, 2012; 13: 407.
- Calabrese A, Paninski L. Kalman filter mixture model for spike sorting of non-stationary data. *Journal of neuroscience methods*, 2011; 196: 159-69.
- Carlson DE, Vogelstein JT, Wu Q, Lian W, Zhou M, Stoetzner CR, Kipke D, Weber D, Dunson DB, Carin L. Multichannel electrophysiological spike sorting via joint dictionary learning and mixture modeling. *IEEE Transactions on Biomedical Engineering*, 2014; 61: 41-54.
- Donoho DL, Johnstone JM. Ideal spatial adaptation by wavelet shrinkage. *biometrika*, 1994; 81: 425-55.
- Einevoll GT, Franke F, Hagen E, Pouzat C, Harris KD. Towards reliable spike-train recordings from thousands of neurons with multielectrodes. *Current opinion in neurobiology*, 2012; 22: 11-7.
- Ekanadham C, Tranchina D, Simoncelli EP. A unified framework and method for automatic neural spike identification. *Journal of neuroscience methods*, 2014; 222: 47-55.
- Ester M, Kriegel H-P, Sander J, Xu X. A density-based algorithm for discovering clusters in large spatial databases with noise. *Kdd*, 1996: 226-31.
- Farina D, Jensen W, Akay M. Introduction to neural engineering for motor rehabilitation. John Wiley & Sons, 2013.

387 Franke F, Natora M, Boucsein C, Munk MH, Obermayer K. An online spike detection and spike classification  
388 algorithm capable of instantaneous resolution of overlapping spikes. *Journal of computational*  
389 *neuroscience*, 2010; 29: 127-48.

390 Ghazizadeh A, Ambroggi F, Odean N, Fields HL. Prefrontal cortex mediates extinction of responding by  
391 two distinct neural mechanisms in accumbens shell. *Journal of Neuroscience*, 2012; 32: 726-37.

392 Gibson S, Judy JW, Marković D. Spike sorting: The first step in decoding the brain: The first step in decoding  
393 the brain. *IEEE Signal processing magazine*, 2012; 29: 124-43.

394 Haga T, Fukayama O, Takayama Y, Hoshino T, Mabuchi K. Efficient sequential Bayesian inference method  
395 for real-time detection and sorting of overlapped neural spikes. *Journal of neuroscience methods*, 2013;  
396 219: 92-103.

397 Harris KD, Henze DA, Csicsvari J, Hirase H, Buzsaki G. Accuracy of tetrode spike separation as determined  
398 by simultaneous intracellular and extracellular measurements. *Journal of neurophysiology*, 2000; 84: 401-  
399 14.

400 Hilgen G, Sorbaro M, Pirmoradian S, Muthmann J-O, Kepiro IE, Ullo S, Ramirez CJ, Encinas AP, Maccione  
401 A, Berdondini L. Unsupervised spike sorting for large-scale, high-density multielectrode arrays. *Cell*  
402 *reports*, 2017; 18: 2521-32.

403 Kim KH, Kim SJ. A wavelet-based method for action potential detection from extracellular neural signal  
404 recording with low signal-to-noise ratio. *IEEE Transactions on Biomedical Engineering*, 2003; 50: 999-1011.

405 Lewicki MS. A review of methods for spike sorting: the detection and classification of neural action  
406 potentials. *Network: Computation in Neural Systems*, 1998; 9: R53-R78.

407 Maaten Lvd, Hinton G. Visualizing data using t-SNE. *Journal of Machine Learning Research*, 2008; 9: 2579-  
408 605.

409 Martinez J, Pedreira C, Ison MJ, Quiroga R. Realistic simulation of extracellular recordings. *Journal*  
410 *of Neuroscience Methods*, 2009; 184: 285-93.

411 Moser EI, Moser M-B. Grid cells and neural coding in high-end cortices. *Neuron*, 2013; 80: 765-74.

412 O'Keefe J. Place units in the hippocampus of the freely moving rat. *Experimental neurology*, 1976; 51: 78-  
413 109.

414 Oliynyk A, Bonifazzi C, Montani F, Fadiga L. Automatic online spike sorting with singular value  
415 decomposition and fuzzy C-mean clustering. *BMC neuroscience*, 2012; 13: 96.

416 Olshausen BA, Field DJ. Sparse coding with an overcomplete basis set: A strategy employed by V1? *Vision*  
417 *research*, 1997; 37: 3311-25.

418 Pedreira C, Martinez J, Ison MJ, Quiroga RQ. How many neurons can we see with current spike sorting  
419 algorithms? *Journal of neuroscience methods*, 2012; 211: 58-65.

420 Quiroga RQ. Spike sorting. *Current Biology*, 2012; 22: R45-R6.

421 Quiroga RQ, Nadasdy Z, Ben-Shaul Y. Unsupervised spike detection and sorting with wavelets and  
422 superparamagnetic clustering. *Neural computation*, 2004; 16: 1661-87.

423 Rey HG, Pedreira C, Quiroga RQ. Past, present and future of spike sorting techniques. *Brain research*  
424 *bulletin*, 2015; 119: 106-17.

425 Rossant C, Kadir SN, Goodman DF, Schulman J, Hunter ML, Saleem AB, Grosmark A, Belluscio M, Denfield  
426 GH, Ecker AS. Spike sorting for large, dense electrode arrays. *Nature neuroscience*, 2016; 19: 634.

427 Stevenson IH, Kording KP. How advances in neural recording affect data analysis. *Nature neuroscience*,  
428 2011; 14: 139.

429 Swindale NV, Spacek MA. Spike sorting for polytrodes: a divide and conquer approach. *Frontiers in*  
430 *systems neuroscience*, 2014; 8: 6.

431 Todorova S, Sadtler P, Batista A, Chase S, Ventura V. To sort or not to sort: the impact of spike-sorting on  
432 neural decoding performance. *Journal of neural engineering*, 2014; 11: 056005.

433 Vargas-Irwin C, Donoghue JP. Automated spike sorting using density grid contour clustering and  
434 subtractive waveform decomposition. *Journal of Neuroscience Methods*, 2007; 164: 1-18.

435 Wild J, Prekopcsak Z, Sieger T, Novak D, Jech R. Performance comparison of extracellular spike sorting  
 436 algorithms for single-channel recordings. *Journal of neuroscience methods*, 2012; 203: 369-76.  
 437 Wood F, Black MJ, Vargas-Irwin C, Fellows M, Donoghue JP. On the variability of manual spike sorting.  
 438 *IEEE Transactions on Biomedical Engineering*, 2004; 51: 912-8.  
 439 Yger P, Spampinato GL, Esposito E, Lefebvre B, Deny S, Gardella C, Stimberg M, Jetter F, Zeck G, Picaud S.  
 440 Fast and accurate spike sorting in vitro and in vivo for up to thousands of electrodes. *BioRxiv*, 2016:  
 441 067843.  
 442 Zaghoul ZS, Bayoumi M. Implementable Spike Sorting techniques for VLSI wireless BCI/BMI implants: A  
 443 survey. *Energy Aware Computing Systems & Applications (ICEAC)*, 2015 International Conference on. IEEE,  
 444 2015: 1-4.

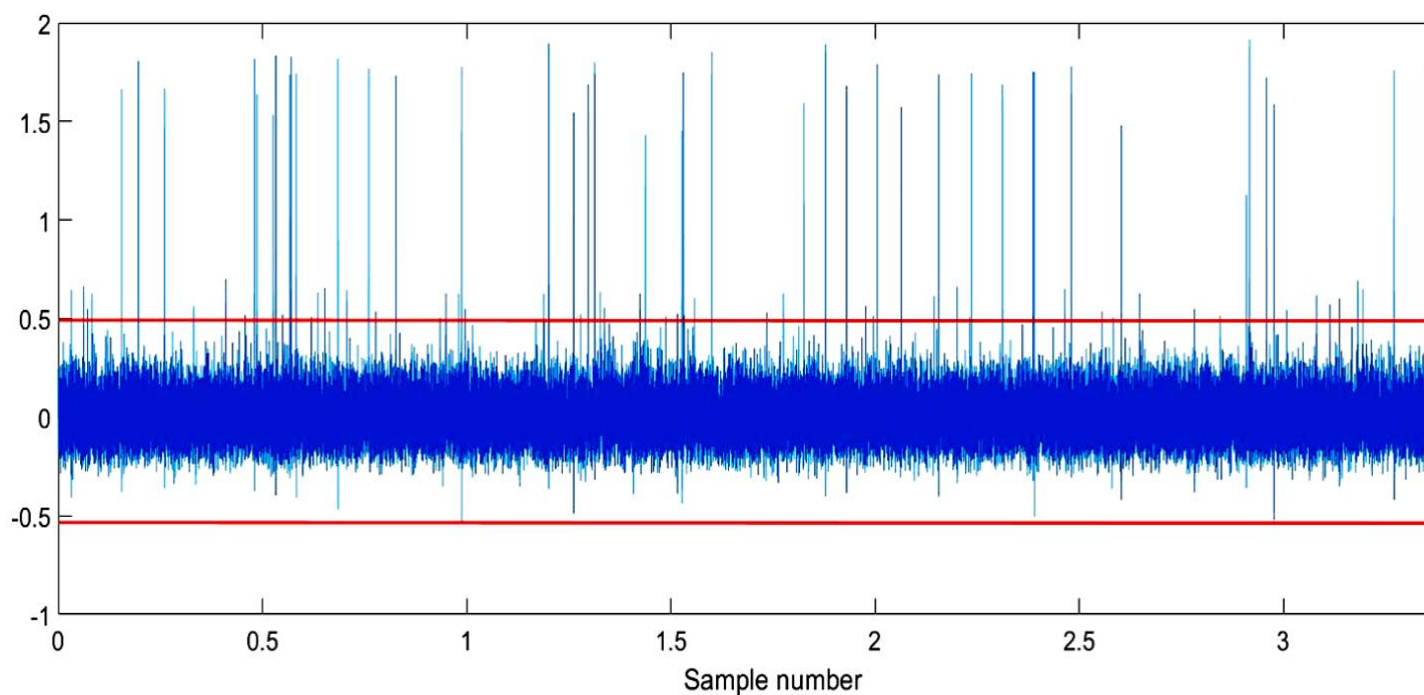

(A)

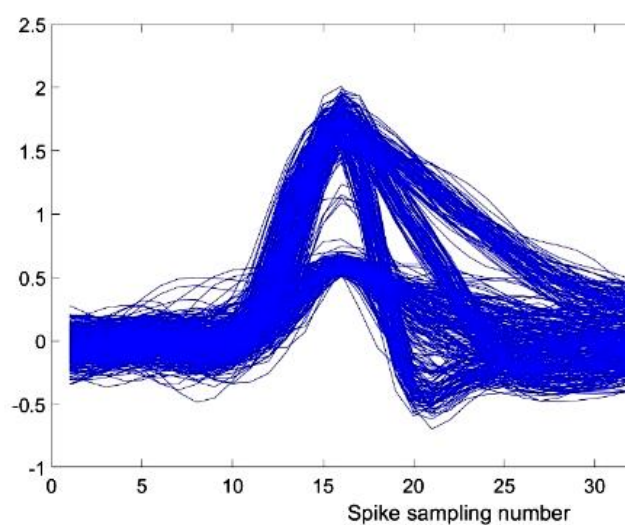

(B)

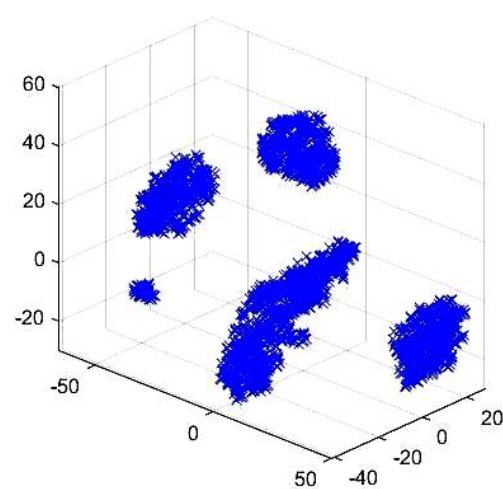

(C)

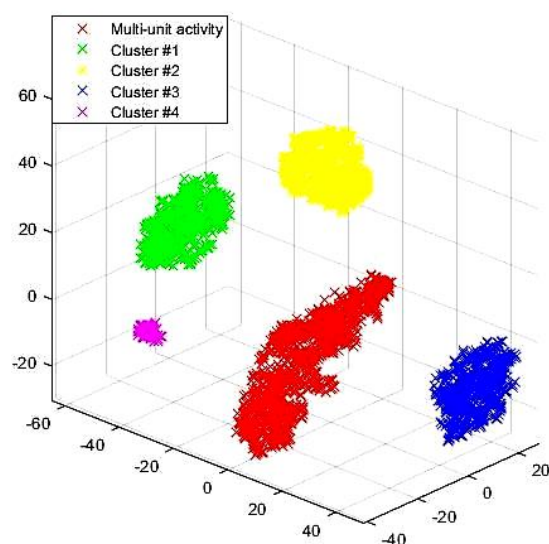

(D)

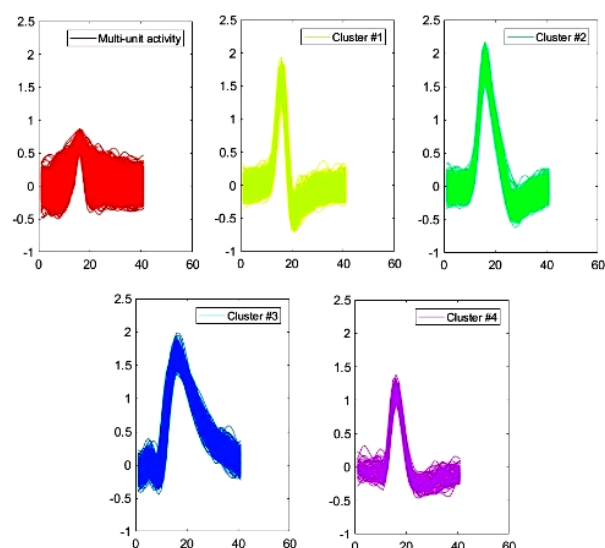

(E)

Fig. 1 Schematic of consecutive steps for our automatic spike sorting procedure. (A) spikes are detected using an amplitude threshold after filtering raw data. (B) all of the detected spikes are extracted and aligned by their positive peaks. (C) dimensionality reduction was used in order to reduce complexity of clustering using t\_SNE. (D) clustering algorithm using DBSCAN. (E) spike shapes associated with each cluster shown in D.

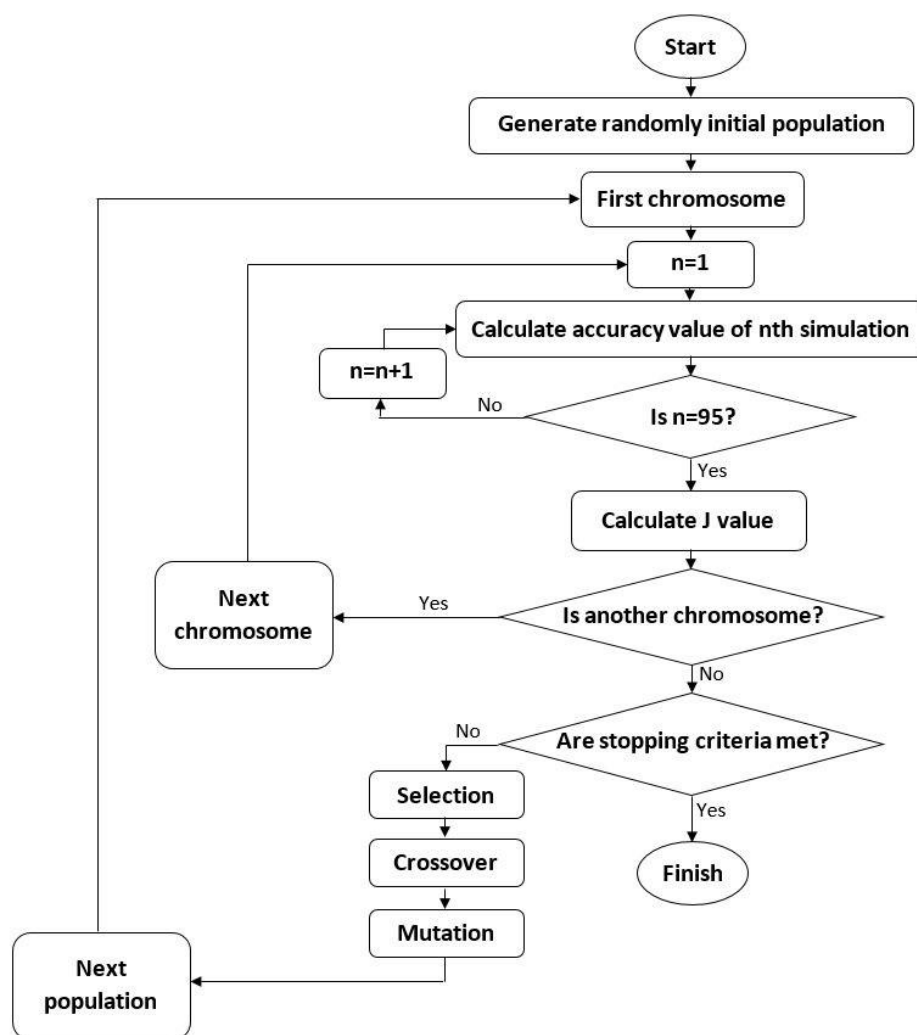

Fig. 2 The flowchart of GA optimization procedure: 1) An initial population is generated by randomly choosing parameters from a specified range. 2) The accuracy of confusion matrix (Acc) for the simulated dataset is calculated. 3) The desirability function (J) was calculated based on the averages accuracy values of confusion matrixes across the sessions. 4) The process is repeated for all chromosomes in the pool. 5) Population is assessed and a new gene pool is formed by: recombination and mutation. 6) This procedure continues until either of stopping criteria.

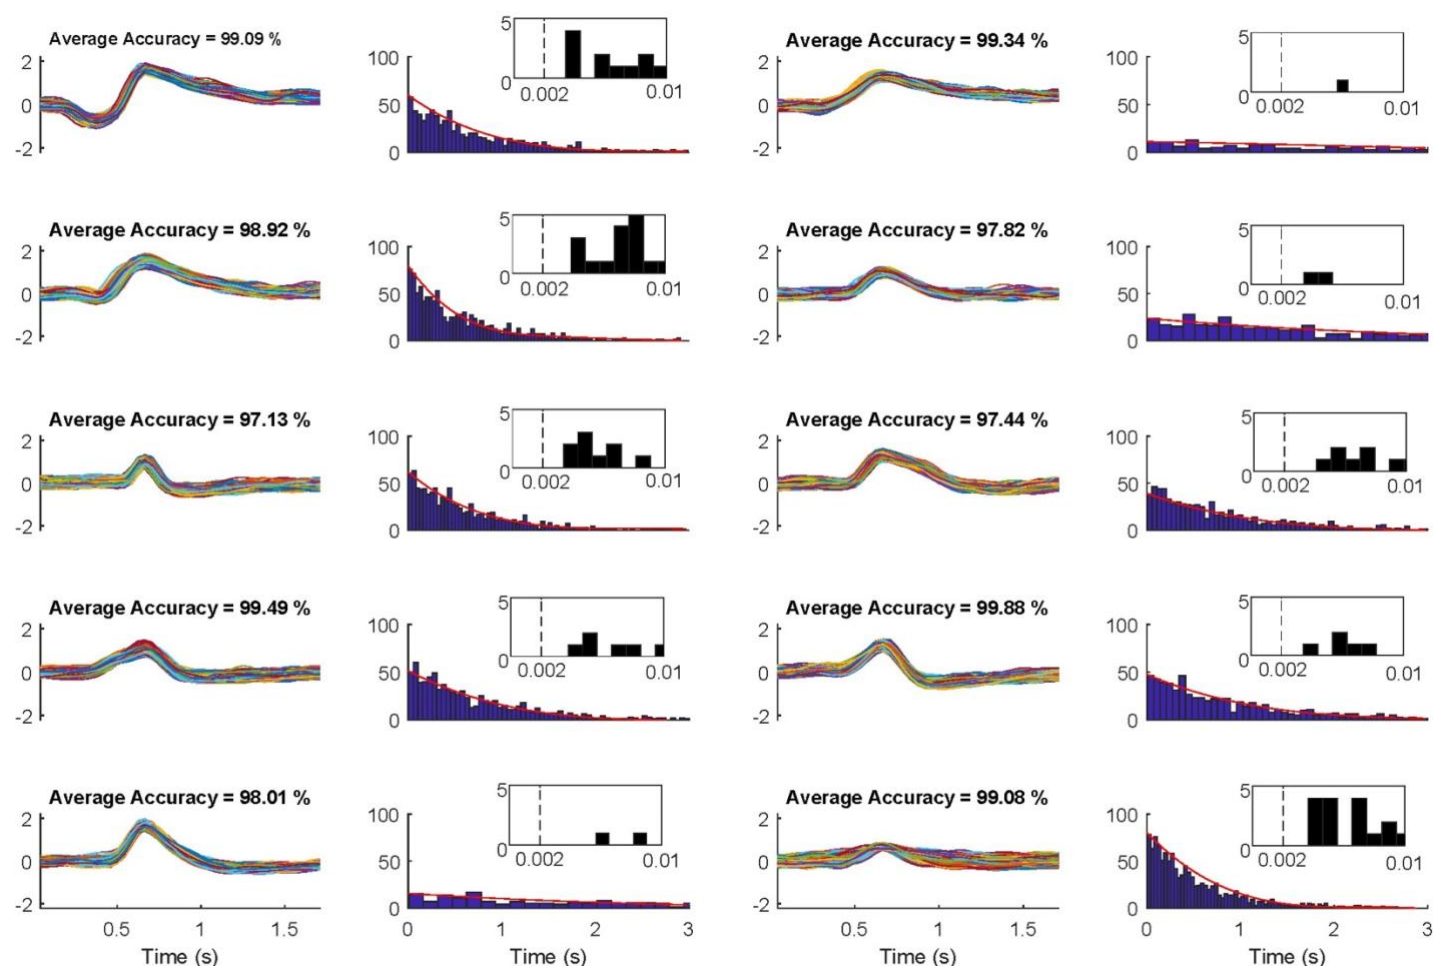

Figure 3. The spike shape and ISI of each neuron determined by our t-SNE and DBSCAN algorithm using GA optimized parameters on a session with 10 simultaneously neurons. There were 10 hit neurons with zero missed neurons. There were not any false positive clusters and any refractory period violations. Performance for each neuron is shown in a pair of plots: all detected spike shapes are shown in the left plot and the ISI distribution is shown in the right plot. The zoomed in distribution of ISIs is shown as an inset in the right plot to allow one to examine ISIs less than 2ms refractory period.

447

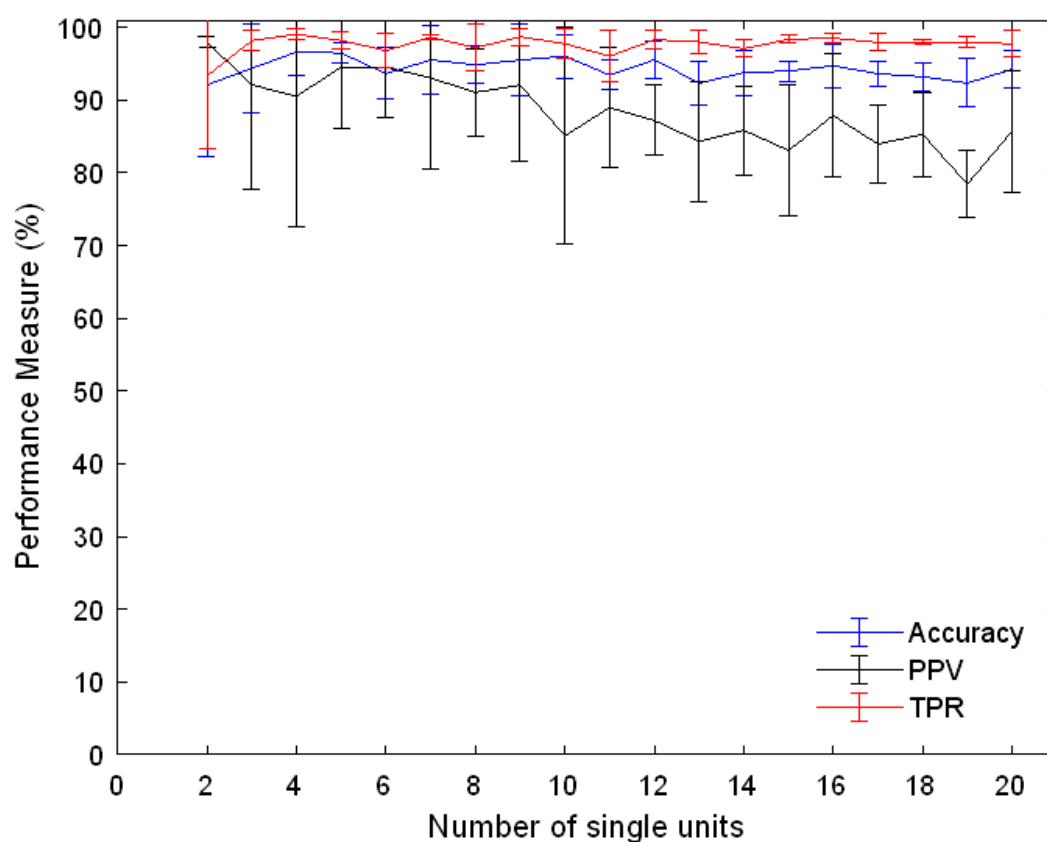

Fig. 4. The accuracy, PPV and TPR performances of the proposed algorithm on all sessions with different number of simultaneously recorded neurons ranging from 2 to 20. The values shown are mean across sessions and the error-bars indicate std.

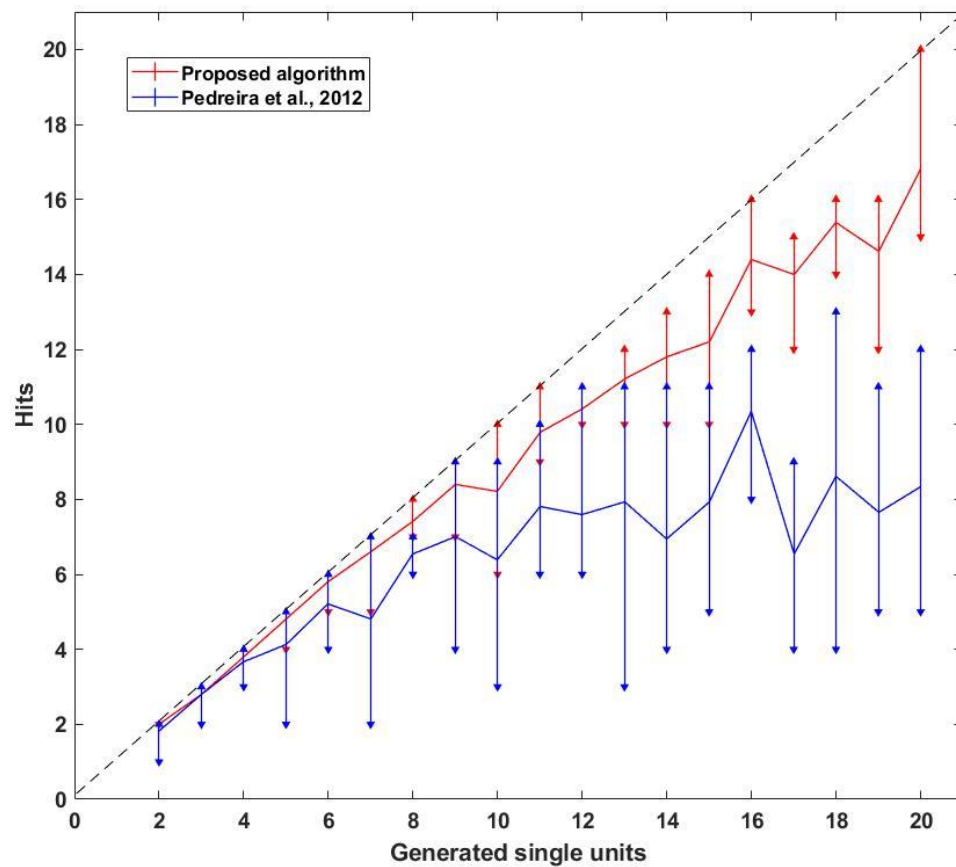

(A)

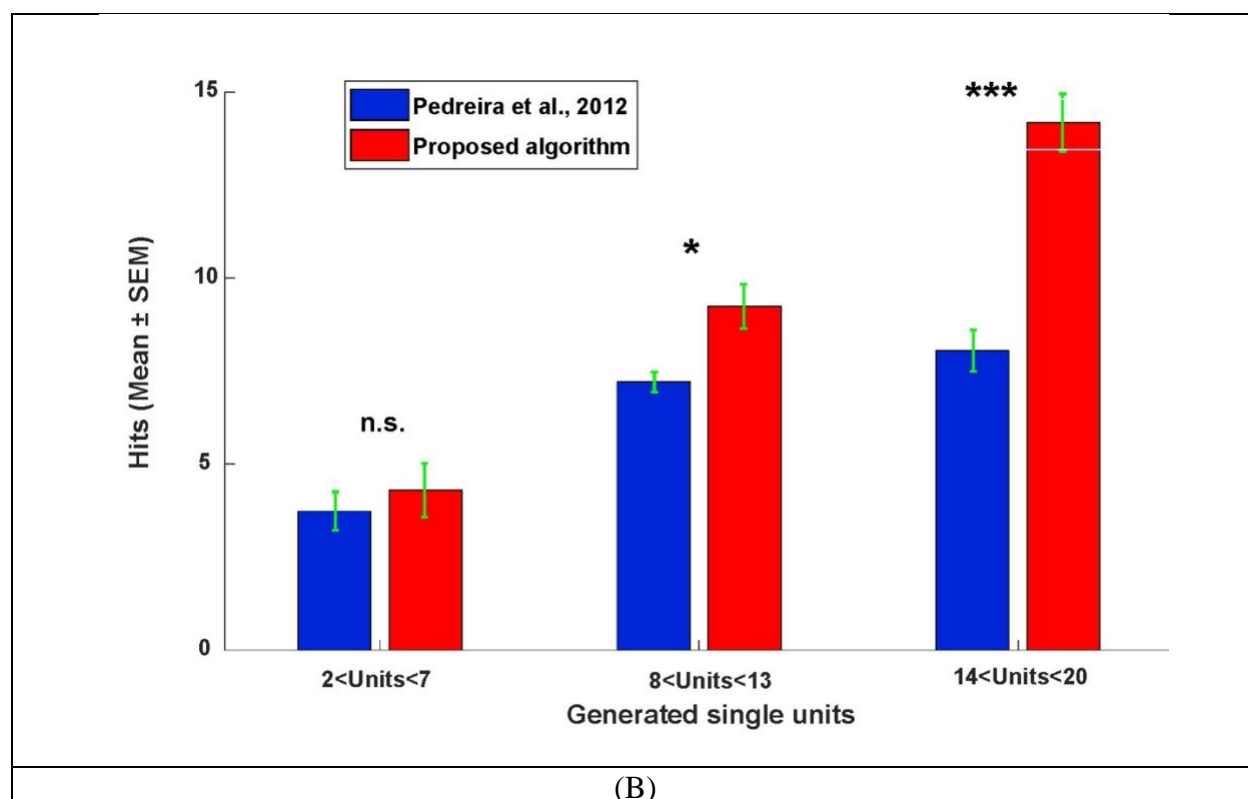

449 Fig. 5. Comparison of performance of our model compared to WAVECLUS (Pedreira et al., 2012;  
450 Rey et al., 2015) on sessions from simulated data. (A) the number of hits with increasing number  
451 of neurons. Upward-pointing triangle and downward-pointing triangle denote maximum and  
452 minimum of hits, respectively. The dashed line has slope of one. (B) The average number hits for  
453 sessions with 2-7, 8-13 or 14-20 units. (mean  $\pm$  SEM is shown, n.s., \* and \*\*\* means  
454 nonsignificant,  $p$ -value $< 0.05$  and  $p$ -value $< 0.001$ , respectively)

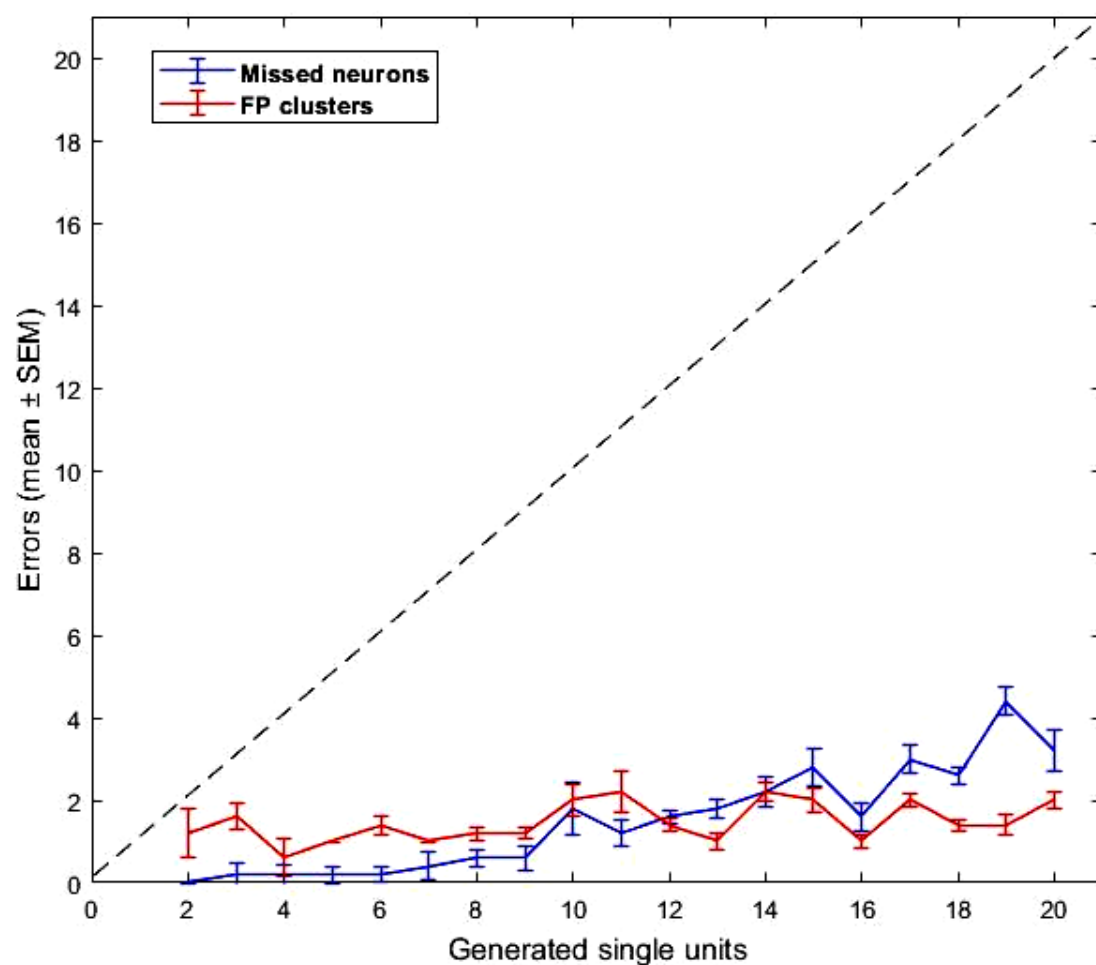

Fig. 6. The Average number of missed neuron and false positives in the proposed algorithm. Error-bars denote SEM.

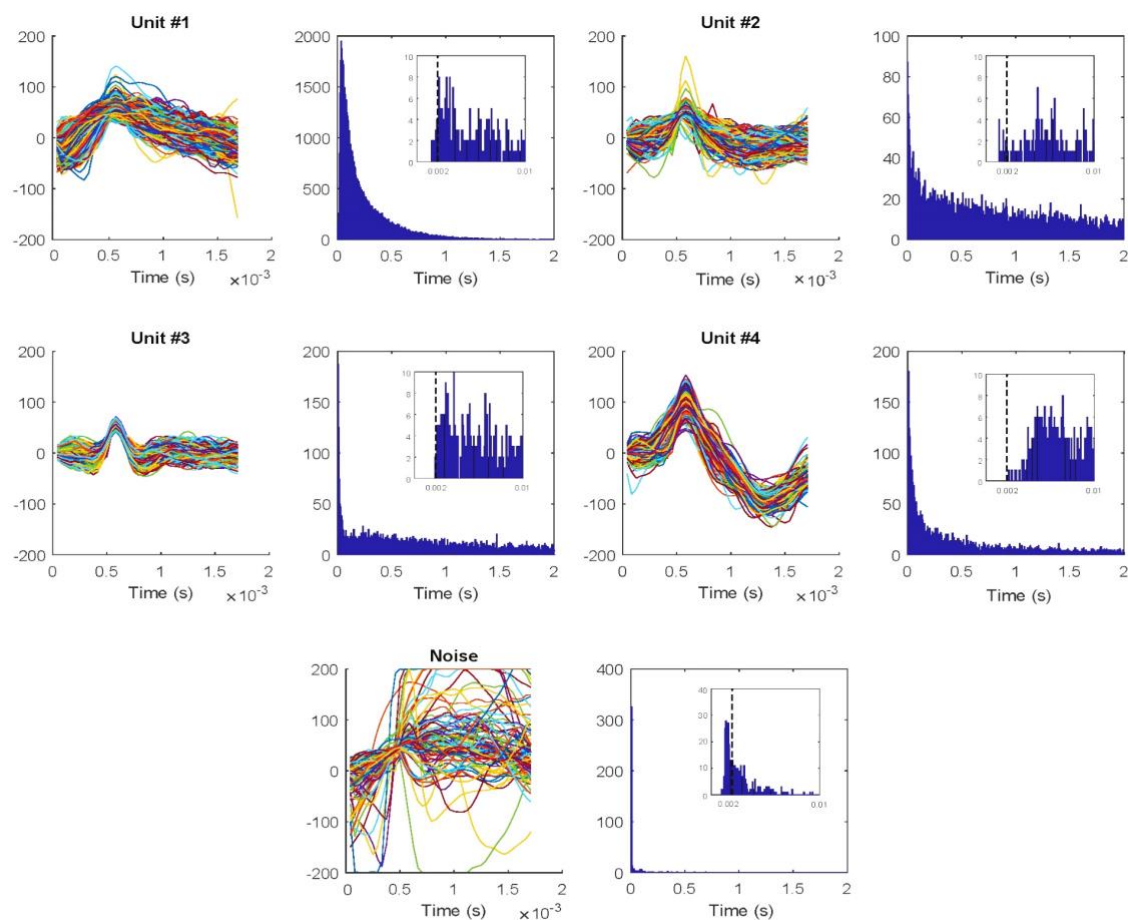

Figure 7. The spike shape and ISI of each neuron using our proposed optimal t-SNE and DBSCAN algorithm on a real signal with 4 neurons. Performance for each neuron is shown in a pair of plots: all detected spike shapes are shown in the left plot and the ISI distribution is shown in the right plot. The zoomed in distribution of ISIs is shown as an inset in the right plot to allow one to examine ISIs less than 2ms refractory period. Spike numbers with ISIs below the minimum refractory period (2 ms) is 0.02% (14 out of 68443 spikes) for unit #1, 0.03% (3 out of 8011 spikes) for unit #2, 0% (0 out of 6601 spikes) for unit #3 but is 32% (169 out of 509 shapes) for noise cluster.

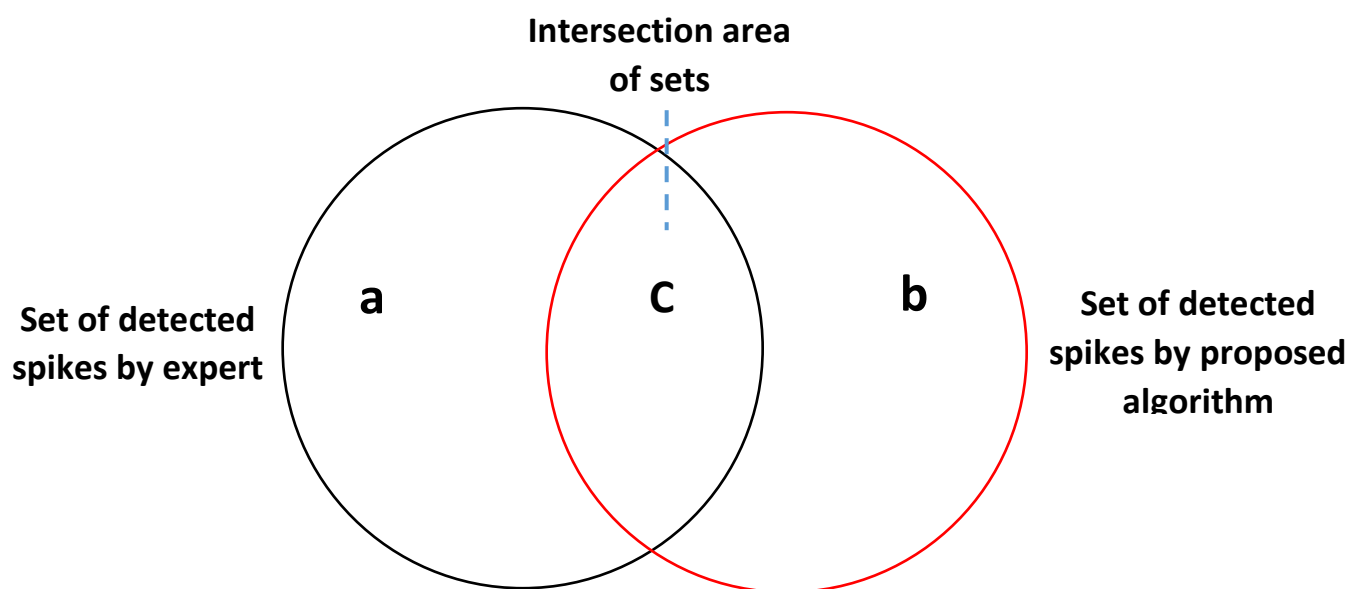

(A)

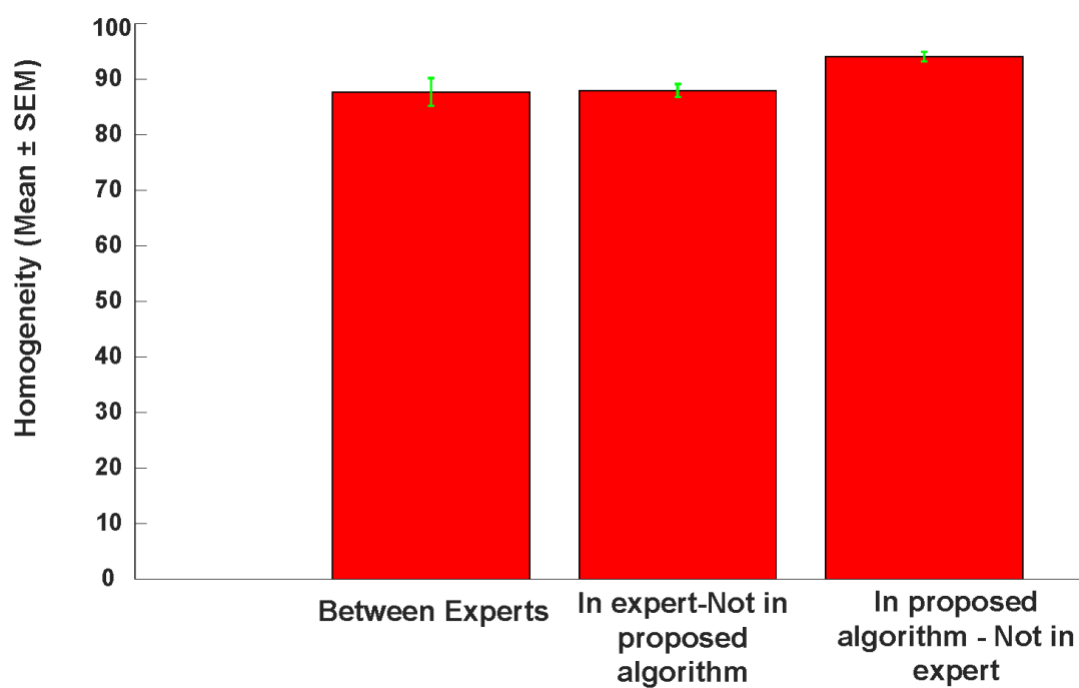

(B)

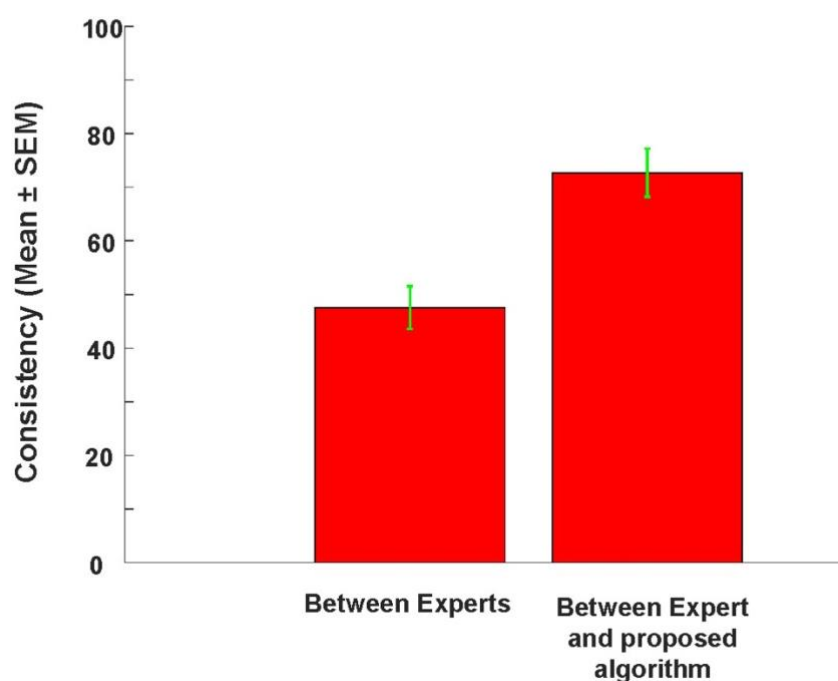

(C)

The results of one-way Anova indicated the means of group are significantly difference ( $F_{1,22}=8.01$ ;  $p$  value = 0.009).

Fig 8. Comparison spike sorting performance of our algorithm with that of 3 experts on real data (A) The Venn diagram showing the relationship between detected spikes for a given unit using our algorithm and a given expert area 'c' (intersection area) denotes spikes detected by both methods. Areas 'a' show spikes detected by the expert not our algorithm and areas 'd' denote spikes detected by our algorithm not by the expert (complement areas). (B) Average of Pearson's correlation coefficient in the complement areas between experts, and for the

complement of in expert – not in proposed algorithm and for the complement of proposed algorithm – not in expert. The higher this average correlation coefficient in the complement areas indicated the higher the homogeneity of detected spikes (C) (C) Average percentage of detected spikes in the intersection area ‘c’ compared with all detected spikes when comparing between experts and between experts and our algorithm. This percentage shows the consistency of various spike detection methods. Consistency of our algorithms and experts was higher than consistency between experts

**Homogeneity:** Average of correlation coefficients between representative of intersection clusters (C) with relative complements spikes  $A \cup B$  or  $D \cup E$

**Consistency:** Spikes numbers of intersection clusters (C) divides by Spikes numbers of  $A \cup B \cup C$  or Spikes numbers of  $C \cup D \cup E$  (based on percentage)

*1.1.1.1 Table 1. Some options for the GA solver.*

| Parameters:                    | Value                |
|--------------------------------|----------------------|
| Population type                | Double vector        |
| Population size                | 200                  |
| Creation function              | Constraint function  |
| Selection function             | Stochastic uniform   |
| Mutation function              | Gaussian             |
| Crossover function             | Constraint dependent |
| Crossover fraction             | 0.7                  |
| Elite count                    | 5                    |
| Generations                    | 100                  |
| Function tolerance             | $10^{-6}$            |
| Nonlinear constraint tolerance | $10^{-6}$            |

**Table 2.** The initial population values of GA algorithm.

| Parameters:          | limit |      |
|----------------------|-------|------|
|                      | Low   | High |
| t-SNE:               |       |      |
| Distance Metric*     | 0     | 11   |
| Perplexity**         | 30    | 150  |
| Exaggeration*        | 3     | 6    |
| Number of Dimension* | 2     | 3    |
| DBSCAN:              |       |      |
| $\epsilon$ ***       | 1     | 10   |
| MinPts ***           | 1     | 10   |

\* Step by increments of 1 (integer)

\*\* Step by increments of 10 (integer)

\*\*\* (floating point)

**Table 3.** the optimal values of t-SNE and DBSCAN

parameters

| Parameters:         | Optimal values |
|---------------------|----------------|
| t-SNE:              |                |
| Distance Metric     | cityblock      |
| Perplexity          | 70             |
| Exaggeration        | 4              |
| Number of Dimension | 3              |
| DBSCAN:             |                |
| $\epsilon$          | 3.39           |
| MinPts              | 2.58           |

**Table 4.** The performance of the proposed algorithm shown as mean $\pm$ std

| Number of neurons | Clustering     |               | Identification (%) |                 |                 |
|-------------------|----------------|---------------|--------------------|-----------------|-----------------|
|                   | Hit            | Miss          | FP                 | TPR             | PPV             |
| 2                 | 2.0 $\pm$ 0.0  | 0.0 $\pm$ 0.0 | 1.4 $\pm$ 0.9      | 0.93 $\pm$ 0.10 | 0.98 $\pm$ 0.01 |
| 3                 | 2.8 $\pm$ 0.4  | 0.2 $\pm$ 0.4 | 1.4 $\pm$ 1.1      | 0.99 $\pm$ 0.01 | 0.91 $\pm$ 0.15 |
| 4                 | 3.8 $\pm$ 0.4  | 0.2 $\pm$ 0.4 | 0.6 $\pm$ 0.9      | 0.98 $\pm$ 0.04 | 0.93 $\pm$ 0.09 |
| 5                 | 4.8 $\pm$ 0.4  | 0.2 $\pm$ 0.4 | 1.2 $\pm$ 0.4      | 0.98 $\pm$ 0.01 | 0.94 $\pm$ 0.08 |
| 6                 | 5.6 $\pm$ 0.6  | 0.4 $\pm$ 0.5 | 1.0 $\pm$ 0.7      | 0.98 $\pm$ 0.01 | 0.91 $\pm$ 0.09 |
| 7                 | 6.6 $\pm$ 0.9  | 0.4 $\pm$ 0.9 | 0.8 $\pm$ 0.4      | 0.99 $\pm$ 0.00 | 0.93 $\pm$ 0.13 |
| 8                 | 7.4 $\pm$ 0.5  | 0.6 $\pm$ 0.5 | 1.2 $\pm$ 0.4      | 0.97 $\pm$ 0.04 | 0.91 $\pm$ 0.06 |
| 9                 | 8.6 $\pm$ 0.9  | 0.4 $\pm$ 0.9 | 0.6 $\pm$ 1.1      | 0.97 $\pm$ 0.02 | 0.92 $\pm$ 0.10 |
| 10                | 8.4 $\pm$ 1.8  | 1.6 $\pm$ 1.8 | 1.6 $\pm$ 1.5      | 0.97 $\pm$ 0.04 | 0.86 $\pm$ 0.10 |
| 11                | 8.8 $\pm$ 1.3  | 2.2 $\pm$ 1.3 | 1.8 $\pm$ 1.8      | 0.97 $\pm$ 0.03 | 0.82 $\pm$ 0.08 |
| 12                | 10.4 $\pm$ 0.5 | 1.6 $\pm$ 0.5 | 1.2 $\pm$ 0.4      | 0.98 $\pm$ 0.01 | 0.86 $\pm$ 0.05 |
| 13                | 11.6 $\pm$ 0.5 | 1.4 $\pm$ 0.5 | 1.0 $\pm$ 0.7      | 0.98 $\pm$ 0.02 | 0.86 $\pm$ 0.06 |
| 14                | 11.2 $\pm$ 1.1 | 2.8 $\pm$ 1.1 | 1.6 $\pm$ 0.9      | 0.97 $\pm$ 0.01 | 0.81 $\pm$ 0.04 |
| 15                | 11.4 $\pm$ 2.0 | 3.6 $\pm$ 2.1 | 2.0 $\pm$ 1.2      | 0.98 $\pm$ 0.01 | 0.82 $\pm$ 0.10 |
| 16                | 14.8 $\pm$ 0.4 | 1.2 $\pm$ 0.4 | 0.4 $\pm$ 1.1      | 0.98 $\pm$ 0.01 | 0.90 $\pm$ 0.04 |
| 17                | 13.8 $\pm$ 1.7 | 3.2 $\pm$ 1.8 | 2.0 $\pm$ 0.7      | 0.98 $\pm$ 0.01 | 0.82 $\pm$ 0.07 |
| 18                | 15.2 $\pm$ 1.1 | 2.8 $\pm$ 1.1 | 1.2 $\pm$ 0.4      | 0.98 $\pm$ 0.00 | 0.83 $\pm$ 0.08 |
| 19                | 15.2 $\pm$ 1.6 | 3.8 $\pm$ 1.6 | 0.8 $\pm$ 1.1      | 0.98 $\pm$ 0.01 | 0.81 $\pm$ 0.06 |
| 20                | 16.4 $\pm$ 2.2 | 3.6 $\pm$ 2.2 | 0.8 $\pm$ 0.8      | 0.98 $\pm$ 0.01 | 0.83 $\pm$ 0.09 |

**Table 5.** The performance of the proposed algorithm vs. experts spikes sorting.

| Cluster                                                                | #1    | #2    | #3    | #4    | Noise |
|------------------------------------------------------------------------|-------|-------|-------|-------|-------|
| <b>Expert #1</b>                                                       |       |       |       |       |       |
| <b>Spikes numbers</b>                                                  |       |       |       |       |       |
| Proposed algorithm                                                     | 68443 | 8127  | 8011  | 6601  | 509   |
| Expert                                                                 | 56096 | 2426  | 7639  | 6234  | 19296 |
| intersection of Expert and proposed algorithm                          | 56042 | 2328  | 7052  | 6233  | 472   |
| In expert-Not in proposed algorithm                                    | 54    | 98    | 587   | 1     | 18824 |
| In proposed algorithm - Not in expert                                  | 12401 | 5799  | 959   | 368   | 37    |
| <b>Average of <math>\rho</math> between intersection clusters with</b> |       |       |       |       |       |
| In expert-Not in proposed algorithm                                    | 85.74 | 78.86 | 75.03 | 74.46 | -     |
| In proposed algorithm - Not in expert                                  | 86.19 | 87.87 | 86.59 | 97.77 | -     |
| <b>Percentage of spikes numbers with <math>\rho &lt; 90\%</math></b>   |       |       |       |       |       |
| In expert-Not in proposed algorithm                                    | 64.81 | 92.86 | 96.42 | 100   | -     |
| In proposed algorithm - Not in expert                                  | 59.1  | 56.91 | 72.89 | 2.18  | -     |
| <b>Expert #2</b>                                                       |       |       |       |       |       |
| <b>Spikes numbers</b>                                                  |       |       |       |       |       |
| Proposed algorithm                                                     | 68443 | 8127  | 8011  | 6601  | 509   |
| Expert                                                                 | 63211 | 5181  | 9846  | 5700  | 7753  |
| intersection of Expert and proposed algorithm                          | 63153 | 3728  | 7345  | 5696  | 471   |
| In expert-Not in proposed algorithm                                    | 58    | 1453  | 2501  | 4     | 7284  |
| In proposed algorithm - Not in expert                                  | 5290  | 4399  | 666   | 905   | 38    |
| <b>Average of <math>\rho</math> between intersection clusters with</b> |       |       |       |       |       |
| In expert-Not in proposed algorithm                                    | 88.01 | 88.12 | 72.94 | 80.01 | -     |
| In proposed algorithm - Not in expert                                  | 84.5  | 86.61 | 87.09 | 99.34 | -     |
| <b>Percentage of spikes numbers with <math>\rho &lt; 90\%</math></b>   |       |       |       |       |       |
| In expert-Not in proposed algorithm                                    | 63.79 | 81.21 | 96.8  | 50    | -     |
| In proposed algorithm - Not in expert                                  | 75.88 | 61.53 | 83.63 | 0.11  | -     |
| <b>Expert #3</b>                                                       |       |       |       |       |       |
| <b>Spikes numbers</b>                                                  |       |       |       |       |       |
| Proposed algorithm                                                     | 68443 | 8127  | 8011  | 6601  | 509   |
| Expert                                                                 | 55199 | 5344  | 7012  | 5926  | 18210 |
| intersection of Expert and proposed algorithm                          | 55176 | 3956  | 7001  | 5895  | 406   |
| In expert-Not in proposed algorithm                                    | 23    | 1388  | 11    | 31    | 17804 |
| In proposed algorithm - Not in expert                                  | 13267 | 4171  | 1010  | 706   | 103   |
| <b>Average of <math>\rho</math> between intersection clusters with</b> |       |       |       |       |       |
| In expert-Not in proposed algorithm                                    | 85.63 | 86.46 | 80.12 | 82.00 |       |
| In proposed algorithm - Not in expert                                  | 92.50 | 86.72 | 90.51 | 98.72 |       |
| <b>Percentage of spikes numbers with <math>\rho &lt; 90\%</math></b>   |       |       |       |       |       |
| In expert-Not in proposed algorithm                                    | 52.18 | 70.24 | 72.73 | 64.52 |       |
| In proposed algorithm - Not in expert                                  | 22.74 | 31.41 | 43.66 | 0.57  |       |
